# Supplementary material for: A facile strategy for enhancing FeCu bimetallic promotion for catalytic phenol oxidation
Source: Royal Society of Chemistry journal article supplement (doi:10.1039/c5cy00242g), 2015-01-01
Supplement: c5cy00242g1.pdf [file c5cy00242g1.pdf]

## Electronic Supplementary Information

# A facile strategy for enhancing FeCu bimetallic promotion for catalytic phenol oxidation

Lei Luo<sup>a</sup>, Chengyi Dai<sup>a</sup>, Anfeng Zhang<sup>a</sup>, Junhu Wang<sup>b</sup>, Min Liu<sup>a</sup>, Chunshan Song<sup>ac\*</sup> and Xinwen Guo<sup>a\*</sup>

<sup>a</sup> State Key Laboratory of Fine Chemicals, PSU-DUT Joint Center for Energy Research, School of Chemical Engineering, Dalian University of Technology, Dalian 116024, P. R. China. Fax: +86-0411-84986134; Tel: +86-0411-84986133; E-mail: [guoxw@dlut.edu.cn](mailto:guoxw@dlut.edu.cn)

<sup>b</sup> Mossbauer Effect Data Center, Dalian Institute of Chemical Physics, Chinese Academy of Sciences, Dalian, 116023, China

<sup>c</sup> EMS Energy Institute, PSU-DUT Joint Center for Energy Research and Department of Energy & Mineral Engineering, Pennsylvania State University, University Park, Pennsylvania 16802, United States. Fax: +1-814-865-3573; Tel: +1-814-863-4466; E-mail: [csong@psu.edu](mailto:csong@psu.edu)

1 XRD patterns of (a) Fe<sub>10</sub>/MI, (b) Fe<sub>10</sub>/ME, (c) Fe<sub>5</sub>Cu<sub>5</sub>/MI, (d) Fe<sub>5</sub>Cu<sub>5</sub>/ME, (e) Cu<sub>10</sub>/MI, (f) Cu<sub>10</sub>/ME.

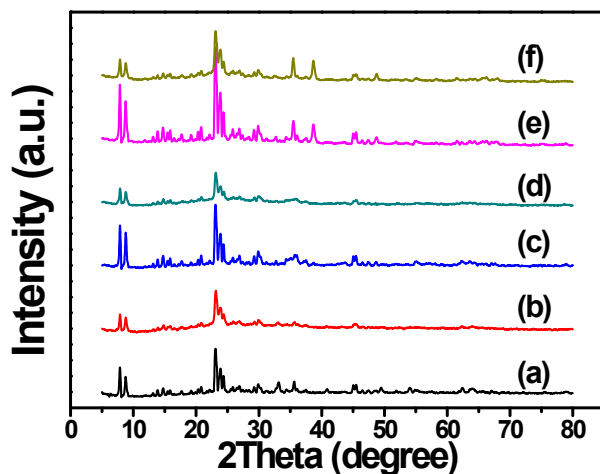

Fig. S1. XRD patterns of (a) Fe<sub>10</sub>/MI, (b) Fe<sub>10</sub>/ME, (c) Fe<sub>5</sub>Cu<sub>5</sub>/MI, (d) Fe<sub>5</sub>Cu<sub>5</sub>/ME, (e) Cu<sub>10</sub>/MI, (f) Cu<sub>10</sub>/ME.

2 Phenol oxidation reaction catalyzed by Fe<sub>5</sub>/ME and Cu<sub>5</sub>/ME.

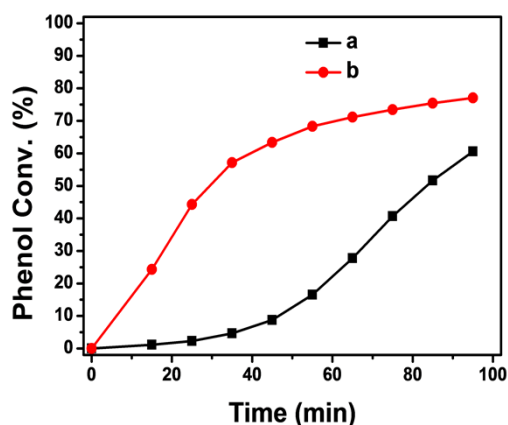

Fig. S2. Phenol conversion in the presence of (a) Fe<sub>5</sub>/ME, (b) Cu<sub>5</sub>/ME. Reaction conditions: Molar ratio: 14 H<sub>2</sub>O<sub>2</sub>: 1 phenol, 20 mg catalyst: 50 ml phenol (1 g/L), temperature is 323 K.

3 TEM images of (a) Fe<sub>10</sub>/MI, (b) Fe<sub>10</sub>/ME, (c) Fe<sub>5</sub>Cu<sub>5</sub>/MI, (d) Fe<sub>5</sub>Cu<sub>5</sub>/ME, (e) Cu<sub>10</sub>/MI, (f) Cu<sub>10</sub>/ME.

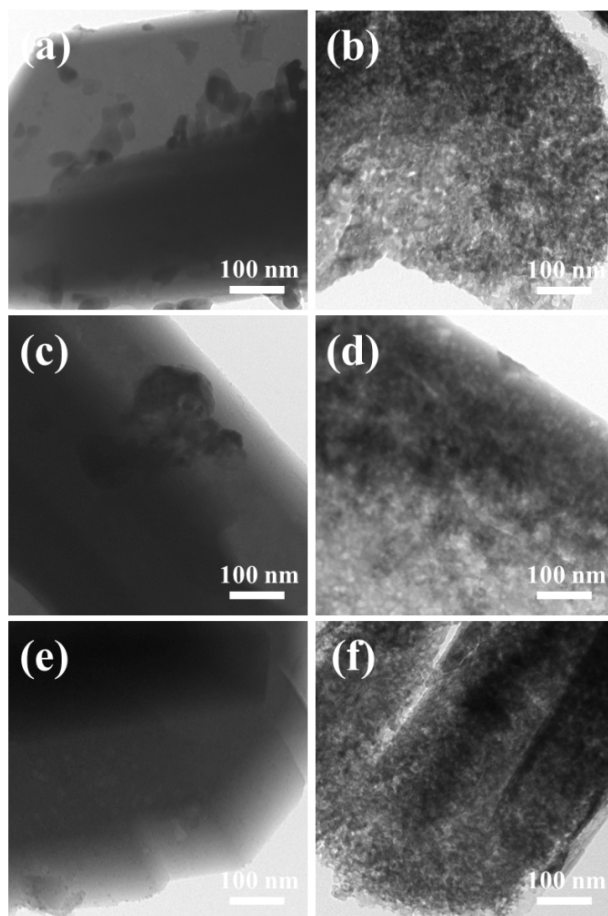

Fig. S3. TEM images of (a) Fe<sub>10</sub>/MI, (b) Fe<sub>10</sub>/ME, (c) Fe<sub>5</sub>Cu<sub>5</sub>/MI, (d) Fe<sub>5</sub>Cu<sub>5</sub>/ME, (e) Cu<sub>10</sub>/MI, (f) Cu<sub>10</sub>/ME.

#### 4 Amount of Cu and Fe in synthetic gel and Fe<sub>x</sub>Cu<sub>y</sub>/ZSM-5 samples.

Table S1. Amount of Cu and Fe in synthetic gel and Fe<sub>x</sub>Cu<sub>y</sub>/ZSM-5 samples.

| Sample                              | Amount of metal in synthetic gel, (wt.%) <sup>a</sup> |    |                                  | Amount of metal in samples <sup>b</sup> |      |                                  |
|-------------------------------------|-------------------------------------------------------|----|----------------------------------|-----------------------------------------|------|----------------------------------|
|                                     | Fe                                                    | Cu | n <sub>Fe</sub> /n <sub>Cu</sub> | Fe                                      | Cu   | n <sub>Fe</sub> /n <sub>Cu</sub> |
| Fe <sub>10</sub> /MI                | 10                                                    | 0  | /                                | 9.73                                    | /    | /                                |
| Fe <sub>10</sub> /ME                | 10                                                    | 0  | /                                | 9.64                                    | /    | /                                |
| Fe <sub>5</sub> Cu <sub>5</sub> /MI | 5                                                     | 5  | 1.1                              | 4.77                                    | 5.31 | 1.03                             |
| Fe <sub>5</sub> Cu <sub>5</sub> /ME | 5                                                     | 5  | 1.1                              | 4.74                                    | 5.25 | 1.03                             |
| Cu <sub>10</sub> /MI                | 0                                                     | 10 | /                                | /                                       | 10.5 | /                                |
| Cu <sub>10</sub> /ME                | 0                                                     | 10 | /                                | /                                       | 10.7 | /                                |

<sup>a</sup> Weight ration of M/support, where M is Fe and Cu. <sup>b</sup> Measured by ICP analysis.

Table S2. Molar ratios of Si/Al in the two supports.

| Sample      | Theoretical Si/Al<br>(mol/mol) | Experimental Si/Al <sup>a</sup><br>(mol/mol) |
|-------------|--------------------------------|----------------------------------------------|
| Micro-ZSM-5 | 40                             | 87.2                                         |
| Meso-ZSM-5  | /                              | 43.5                                         |

<sup>a</sup> Measured by ICP analysis.

**5 Ar adsorption/desorption isotherms of sample (a) Fe<sub>10</sub>/MI, (b) Fe<sub>10</sub>/ME, (c) Fe<sub>5</sub>Cu<sub>5</sub>/MI, (d) Fe<sub>5</sub>Cu<sub>5</sub>/ME, (e) Cu<sub>10</sub>/MI, (f) Cu<sub>10</sub>/ME.**

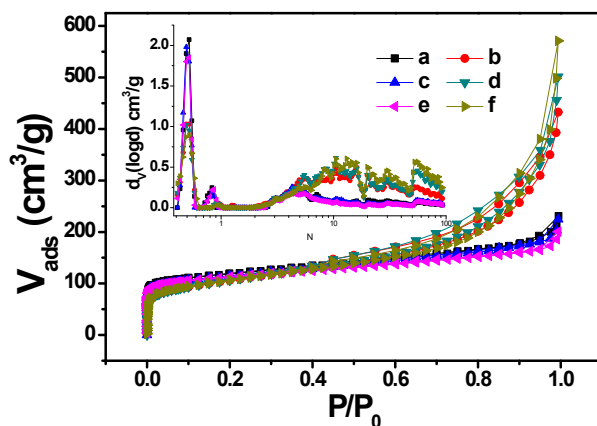

Fig. S4. Ar adsorption/desorption isotherms at 87 K and pore size distributions of (a) Fe<sub>10</sub>/MI, (b) Fe<sub>10</sub>/ME, (c) Fe<sub>5</sub>Cu<sub>5</sub>/MI, (d) Fe<sub>5</sub>Cu<sub>5</sub>/ME, (e) Cu<sub>10</sub>/MI, (f) Cu<sub>10</sub>/ME. The pore size distributions were determined by non-local density functional theory (NLDFT).

Table S3. Textural properties of (a) Fe<sub>10</sub>/MI, (b) Fe<sub>10</sub>/ME, (c) Fe<sub>5</sub>Cu<sub>5</sub>/MI, (d) Fe<sub>5</sub>Cu<sub>5</sub>/ME, (e) Cu<sub>10</sub>/MI, (f) Cu<sub>10</sub>/ME.

| Sample | $S_{micro}^{[a]}$<br>[m <sup>2</sup> g <sup>-1</sup> ] | $S_{meso}^{[a]}$<br>[m <sup>2</sup> g <sup>-1</sup> ] | $S_{BET}^{[b]}$<br>[m <sup>2</sup> g <sup>-1</sup> ] | $V_{micro}^{[a]}$<br>[cm <sup>3</sup> g <sup>-1</sup> ] | $V_{pore}^{[c]}$<br>[cm <sup>3</sup> g <sup>-1</sup> ] |
|--------|--------------------------------------------------------|-------------------------------------------------------|------------------------------------------------------|---------------------------------------------------------|--------------------------------------------------------|
| a      | 260                                                    | 127                                                   | 387                                                  | 0.10                                                    | 0.29                                                   |
| b      | 133                                                    | 199                                                   | 332                                                  | 0.05                                                    | 0.55                                                   |
| c      | 230                                                    | 138                                                   | 368                                                  | 0.08                                                    | 0.29                                                   |
| d      | 128                                                    | 203                                                   | 331                                                  | 0.05                                                    | 0.64                                                   |
| e      | 260                                                    | 108                                                   | 368                                                  | 0.10                                                    | 0.26                                                   |
| f      | 148                                                    | 183                                                   | 331                                                  | 0.06                                                    | 0.73                                                   |

[a] t-plot method [b] BET method [c]  $P/P_0=0.99$ .

**6 Recycling performance of Fe<sub>5</sub>Cu<sub>5</sub>/MI and Fe<sub>5</sub>Cu<sub>5</sub>/ME.**

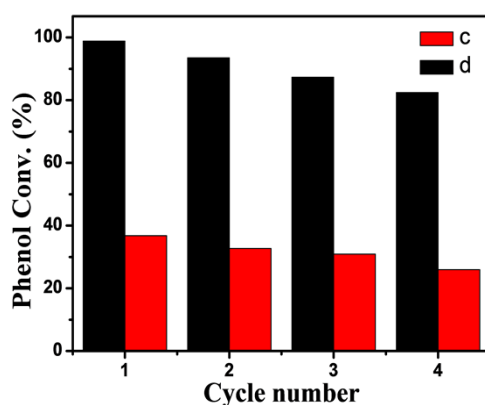

Fig. S5. The recycling performance of sample (c) Fe<sub>5</sub>Cu<sub>5</sub>/MI and (d) Fe<sub>5</sub>Cu<sub>5</sub>/ME.

**7 Metal leaching performance analysis by ICP.**

Table S4. Metal leaching performance analysis by ICP.

| Sample                              | Metal leaching |           |
|-------------------------------------|----------------|-----------|
|                                     | Fe (mg/L)      | Cu (mg/L) |
| Fe <sub>10</sub> /MI                | 0.08           | /         |
| Fe <sub>10</sub> /ME                | 1.27           | /         |
| Fe <sub>5</sub> Cu <sub>5</sub> /MI | 0.27           | 2.81      |
| Fe <sub>5</sub> Cu <sub>5</sub> /ME | 1.62           | 2.13      |
| Cu <sub>10</sub> /MI                | /              | 3.41      |
| Cu <sub>10</sub> /ME                | /              | 3.16      |

### 8 Catalytic performance of Fe<sub>5</sub>Cu<sub>5</sub>/SBA-15.

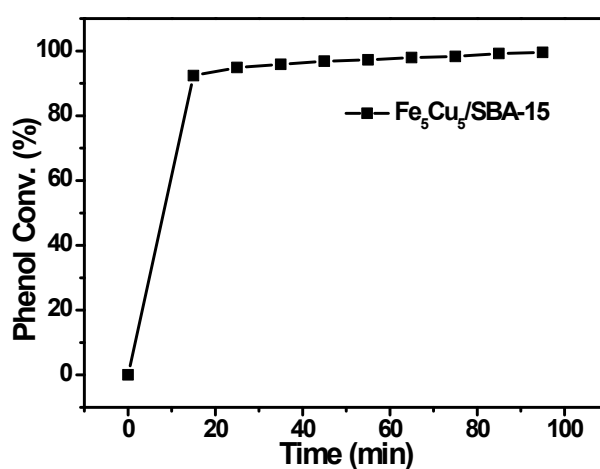

Fig. S6. Phenol conversion in the presence of Fe<sub>5</sub>Cu<sub>5</sub>/SBA-15.

### 9 Efficiency of H<sub>2</sub>O<sub>2</sub>.

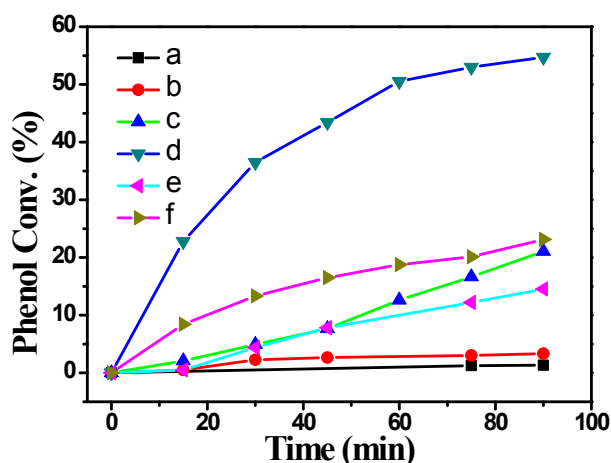

Fig. S7. H<sub>2</sub>O<sub>2</sub> degradation in the presence of (a) Fe<sub>10</sub>/MI, (b) Fe<sub>10</sub>/ME, (c) Fe<sub>5</sub>Cu<sub>5</sub>/MI, (d) Fe<sub>5</sub>Cu<sub>5</sub>/ME, (e) Cu<sub>10</sub>/MI, (f) Cu<sub>10</sub>/ME. Reaction conditions: Molar ratio: 14 H<sub>2</sub>O<sub>2</sub>: 1 phenol, 20 mg catalyst : 50 ml phenol (1 g/L), temperature is 323 K.

### 10 Catalytic performance of Fe<sub>5</sub>Cu<sub>5</sub>/meso-S-1.

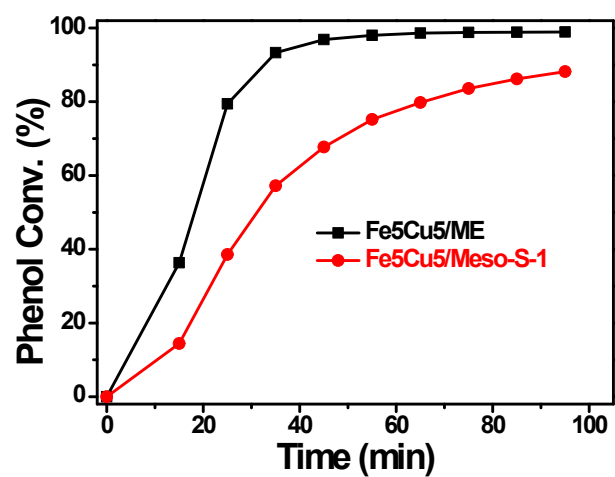

Fig S8. Phenol conversion in the presence of Fe<sub>5</sub>Cu<sub>5</sub>/ME and Fe<sub>5</sub>Cu<sub>5</sub>/meso-S-1.
